# Supplementary material for: Shared decision making for adults with severe mental illness: A concept analysis
Source: PubMed Central journal article supplement — Jpn J Nurs Sci. 2020 Aug 5;17(4):e12365. doi: 10.1111/jjns.12365 (PMC7590107; doi:10.1111/jjns.12365), 2020-08-05
Supplement: JJNS-17-na-s001.pdf [file JJNS-17-na-s001.pdf]

**Appendix 1. Articles included in the concept analysis**

| First author  | Year  | Country      | Setting                           | Participants                                                                                       | Study design                          |
|---------------|-------|--------------|-----------------------------------|----------------------------------------------------------------------------------------------------|---------------------------------------|
| Alegria       | 2018  | USA          | Outpatient/community              | 312 users (D, other), 74 clinicians                                                                | RCT                                   |
| Ali           | 2015  | USA          | An electronic survey              | 29 professionals (psychiatrists, psychiatric residents)                                            | Cross-sectional study                 |
| Aljumah       | 2015  | Saudi Arabia | Outpatient/community              | 239 users (D)                                                                                      | RCT                                   |
| An            | 2017  | Korea        | Inpatients                        | 60 users (Sz)                                                                                      | Pretest–posttest design               |
| Aoki          | 2019a | Japan        | Outpatient/community              | 10 users (Sz, D, BD, other)                                                                        | Qualitative research                  |
| Aoki          | 2019b | Japan        | Outpatient/community              | 88 users (D, BD)                                                                                   | RCT                                   |
| Bonfils       | 2018  | USA          | Outpatient/community              | 12 staff members (psychiatrist, peer specialist, other)                                            | Qualitative research                  |
| Brooks        | 2017  | UK           | Outpatient/community              | 10 users taking antipsychotic drug, 10 carers, and 13 professionals (psychiatrists, nurses)        | Qualitative research                  |
| Campbell      | 2014  | USA          | Outpatient/community              | 84 users (SMI)                                                                                     | Pretest–posttest control group design |
| Chong         | 2013a | Australia    | Both outpatient and inpatient     | 31 professionals (psychiatrists, mental health nurses, other)                                      | Qualitative research                  |
| Chong         | 2013b | Australia    | Both outpatient and inpatient     | 31 professionals (psychiatrists, mental health nurses, other)                                      | Qualitative research                  |
| De las Cuevas | 2011  | Spain        | Outpatient/community              | 435 users taking psychotropic drugs                                                                | Cross-sectional study                 |
| De las Cuevas | 2014  | Spain        | Outpatient/community              | 864 users (Sz, D, BD, other)                                                                       | Cross-sectional study                 |
| Ehrlich       | 2017  | Australia    | Outpatient/community              | 32 users (Sz, BD, other)                                                                           | Qualitative research                  |
| Eliacin       | 2015  | USA          | Outpatient/community              | 54 users (Sz, MD, other)                                                                           | Qualitative research                  |
| Finnerty      | 2018  | USA          | Outpatient/community              | 1416 users (Sz, other)                                                                             | Longitudinal study                    |
| Finnerty      | 2019  | USA          | Outpatient/community              | 543 users receiving specialty mental health services                                               | Mixed methods                         |
| Fukui         | 2014  | USA          | Outpatient/community              | 191 consultations between users (Sz, other) and professionals (psychiatrists, nurse practitioners) | Cross-sectional study                 |
| Fukui         | 2015  | USA          | Outpatient/community              | 128 consultations between users (Sz, D, BD) and professionals                                      | Cross-sectional study                 |
| Giacco        | 2018  | UK           | Outpatient/community              | 22 users (Sz, MD, other), 18 psychiatrists                                                         | Qualitative research                  |
| Goscha        | 2015  | USA          | Outpatient/community              | 12 users (SMI), 13 professionals (psychiatrist, nurses, social workers, other), 2 peer supporters  | Qualitative research                  |
| Grim          | 2016  | Sweden       | Outpatient/community              | 22 users with psychiatric diagnosis                                                                | Qualitative research                  |
| Hamann        | 2011  | Germany      | Inpatient                         | 61 users (Sz)                                                                                      | RCT                                   |
| Hamann        | 2012  | Germany      | Distributed at an annual congress | 238 psychiatrists                                                                                  | Cross-sectional study                 |

(continued)

|            |       |             |                               |                                                                                                                                    |                       |
|------------|-------|-------------|-------------------------------|------------------------------------------------------------------------------------------------------------------------------------|-----------------------|
| Hamann     | 2016  | Germany     | Both outpatient and inpatient | 16 users (SMI), 17 psychiatrists                                                                                                   | Qualitative research  |
| Hamann     | 2017a | Germany     | Both outpatient and inpatient | 329 users (Sz, affective disorder)                                                                                                 | Cross-sectional study |
| Hamann     | 2017b | Germany     | Inpatient                     | 264 users (Sz)                                                                                                                     | RCT                   |
| Hamera     | 2010  | USA         | Outpatient/community          | 98 consultations between users (Sz, D, BD, other) and professionals (psychiatrists, nurses)                                        | Qualitative research  |
| Ishi       | 2017  | Japan       | Inpatient                     | 24 users (Sz)                                                                                                                      | RCT                   |
| Kivelitz   | 2018  | Germany     | Inpatient                     | 24 users (affective disorder, other)                                                                                               | Qualitative research  |
| Klausen    | 2017  | Norway      | Outpatient/community          | 25 users (SMI, other)                                                                                                              | Qualitative research  |
| Klingaman  | 2015  | USA         | Outpatient/community          | 228 users (SMI)                                                                                                                    | Cross-sectional study |
| Kreyenbuhl | 2016  | USA         | Outpatient/community          | 65 users (first episode of psychosis)                                                                                              | Cross-sectional study |
| LeBlanc    | 2015  | USA         | Outpatient/community          | 301 users (D), 117 clinicians                                                                                                      | RCT                   |
| Lovell     | 2018  | UK          | Outpatient/community          | 604 users (psychosis, Sz, BD, other), 90 carers                                                                                    | RCT                   |
| Luciano    | 2019  | Italy       | Outpatient/community          | 588 users (SMI), 213 professionals (psychiatrist, nurses, occupational therapists, social workers, clinical psychologists, others) | Longitudinal study    |
| Lukens     | 2013  | USA         | Factorial survey              | 87 social workers working with adults with SMI                                                                                     | RCT                   |
| Mahone     | 2011  | USA         | Outpatient/community          | 24 users (SMI), 4 carers, 10 professionals (psychiatrist, nurse practitioner, other), 6 clinical staff                             | Qualitative research  |
| Martin     | 2015  | Canada      | Both outpatient and inpatient | 14 current users (Sz, other), 29 past users (Sz, other)                                                                            | Qualitative research  |
| Matthias   | 2012  | USA         | Outpatient/community          | 40 consultations between users (SMI) and professionals (psychiatrists, nurse practitioners)                                        | Cross-sectional study |
| Matthias   | 2014  | USA         | Outpatient/community          | 63 consultations between users (Sz, MD, other) and professionals                                                                   | Cross-sectional study |
| Matthias   | 2017  | USA         | Outpatient/community          | 63 consultations between users (Sz, MD, other) and professionals                                                                   | Cross-sectional study |
| Mccabe     | 2013  | UK          | Outpatient/community          | 72 consultations between users (Sz, D) and professionals (psychiatrists)                                                           | Cross-sectional study |
| Metz       | 2018  | Netherlands | Outpatient/community          | 200 users (MD, other)                                                                                                              | RCT                   |
| Metz       | 2019  | Netherlands | Outpatient/community          | 186 users (SMI)                                                                                                                    | RCT                   |
| Mikesell   | 2016  | USA         | Outpatient/community          | 14 users (SMI), 6 carers, 25 clinicians                                                                                            | Qualitative research  |
| Nott       | 2018  | UK          | Both outpatient and inpatient | 109 users (Sz, D, BD, other)                                                                                                       | Cross-sectional study |
| Park       | 2014  | USA         | Outpatient/community          | 239 users (SMI)                                                                                                                    | Cross-sectional study |

(continued)

|                 |      |             |                               |                                                                                                                                                             |                         |
|-----------------|------|-------------|-------------------------------|-------------------------------------------------------------------------------------------------------------------------------------------------------------|-------------------------|
| Patel           | 2014 | USA         | Outpatient/community          | 15 professionals (nurse practitioners, psychiatrists, social workers, others)                                                                               | Qualitative research    |
| Paudel          | 2018 | USA         | Outpatient/community          | 21 users (SMI)                                                                                                                                              | Cross-sectional study   |
| Perestelo       | 2017 | Spain       | Outpatient/community          | 147 users (D)                                                                                                                                               | RCT                     |
| Ramon           | 2017 | UK          | Outpatient/community          | 47 users (Sz, D, BD), 12 psychiatrists, 35 care coordinators                                                                                                | Mixed methods           |
| Raue            | 2019 | USA         | Outpatient/community          | 202 users (D)                                                                                                                                               | RCT                     |
| Sather          | 2019 | Norway      | Outpatient/community          | 10 users who had experienced transition into and out of inpatient services                                                                                  | Qualitative research    |
| Schön           | 2018 | Sweden      | Both outpatient and inpatient | 95 professionals (social workers, occupational therapists, clinical psychologists, nurses, psychiatrists, other)                                            | Mixed methods           |
| Shepherd        | 2014 | UK          | Both outpatient and inpatient | 27 consultant psychiatrists                                                                                                                                 | Qualitative research    |
| Solberg         | 2014 | USA         | Outpatient/community          | 1168 users (D)                                                                                                                                              | Cross-sectional study   |
| Stacey          | 2016 | UK          | Inpatient                     | Both users and professionals                                                                                                                                | Qualitative research    |
| Stead           | 2017 | UK          | Outpatient/community          | 47 users (SMI, other), 45 professionals (psychiatrists, nurses, occupational therapists, clinical psychologists, social workers, others), 2 peer supporters | Longitudinal study      |
| Stein           | 2014 | USA         | Outpatient/community          | 122 users (taking psychotropic drugs)                                                                                                                       | Longitudinal study      |
| Van der Krieke  | 2013 | Netherlands | Outpatient/community          | 250 users (psychosis)                                                                                                                                       | RCT                     |
| Velligan        | 2016 | USA         | Inpatient                     | 10 users (SMI), 8 carers                                                                                                                                    | Qualitative research    |
| Verwijmeren     | 2018 | Netherlands | Outpatient/community          | 81 consultations between users (BD) and professionals                                                                                                       | Cross-sectional study   |
| Woltmann        | 2010 | USA         | Outpatient/community          | 16 users (SMI)                                                                                                                                              | Qualitative research    |
| Woltmann        | 2011 | USA         | Outpatient/community          | 80 users (SMI, other), 20 social workers                                                                                                                    | RCT                     |
| Wright-Berryman | 2017 | USA         | Outpatient/community          | 9 users (SMI), 5 professionals                                                                                                                              | Qualitative research    |
| Yamaguchi       | 2017 | Japan       | Outpatient/community          | 53 users (Sz, D, BD, other)                                                                                                                                 | RCT                     |
| Younas          | 2016 | UK          | Both outpatient and inpatient | 15 mental health pharmacists                                                                                                                                | Qualitative research    |
| Zaini           | 2018 | Malaysia    | Outpatient/community          | 11 users (D), 19 doctors                                                                                                                                    | Qualitative research    |
| Zisman-ilani    | 2019 | USA         | Inpatients                    | 101 users (Sz, D, MD, other)                                                                                                                                | Pretest–posttest design |

D: depression, Sz: schizophrenia, BD: bipolar disorder, SMI; severe mental illness, MD: mood disorder, RCT: randomized controlled trial
