# Supplementary material for: Shared decision making for adults with severe mental illness: A concept analysis
Source: PubMed Central journal article supplement — Jpn J Nurs Sci. 2020 Aug 5;17(4):e12365. doi: 10.1111/jjns.12365 (PMC7590107; doi:10.1111/jjns.12365), 2020-08-05
Supplement: JJNS-17-na-s002.pdf [file JJNS-17-na-s002.pdf]

## Appendix 2. Antecedents of SDM for adults with SMI

| Themes                           | Sub-themes                      | Article                                                                                                                                                                                                                                                                      |
|----------------------------------|---------------------------------|------------------------------------------------------------------------------------------------------------------------------------------------------------------------------------------------------------------------------------------------------------------------------|
| <b>Long-term complex illness</b> |                                 | Ehrlich, Fukui <sup>2014</sup> , Grim, Hamann <sup>2016</sup> , Lovell, Luciano, Luken, Matthias <sup>2014</sup> , McCabe, Schön, Younas                                                                                                                                     |
| <b>Power imbalance</b>           |                                 | Alegria, Chong <sup>b</sup> , Eliacin, Fukui <sup>2014</sup> , Goscha, Grim, Hamann <sup>2012,2016,2017a</sup> , Ishi, Klausen, Metz <sup>2018</sup> , Mikesell, Ramon, Sather, Schön, Stacey, Stead                                                                         |
| <b>Global trend</b>              | <i>User-centered healthcare</i> | Alegria, Chong <sup>b</sup> , Eliacin, Giacco, Hamera, Klausen, Klingaman, LeBlanc, Lovell, Mahone, McCabe, Mikesell, Nott, Perestelo, Ramon, Sather, Schön, Velligan, Verwijmeren, Woltmann <sup>2010</sup> , Younas, Zaini                                                 |
|                                  | <i>Recovery movement</i>        | An, Aoki <sup>a</sup> , Chong <sup>b</sup> , Eliacin, Fukui <sup>2015</sup> , Grim, Klingaman, Luken, Mahone, Matthias <sup>2017</sup> , Mikesell, Park, Paudel, Van der Krieke, Woltmann <sup>2011</sup> , Zaini                                                            |
|                                  | <i>Information technology</i>   | Chong <sup>b</sup> , Mikesell, Schön, Hamera, Mahone, Finnerty <sup>2019</sup> , Grim, Woltmann <sup>2011</sup> , Ramon                                                                                                                                                      |
| <b>Users' desire</b>             |                                 | Aoki <sup>a</sup> , Chong <sup>b</sup> , De las Cuevas <sup>2011,2014</sup> , Ehrlich, Eliacin, Giacco, Grim, Hamann <sup>2011</sup> , Kivelitz, Klingaman, Martin, Mikesell, Park, Sather, Velligan, Verwijmeren, Woltmann <sup>2010</sup> , Wright-Berryman, Younas, Zaini |
| <b>Concerns</b>                  | <i>Capacity of users</i>        | Ali, An, Chong <sup>a,b</sup> , De las Cuevas <sup>2011</sup> , Giacco, Grim, Hamann <sup>2011,2016</sup> , Ishi, Klausen, Luken, Mahone, Mikesell, Perestelo, Sather, Schön, Shepherd, Velligan, Wright-Berryman, Younas                                                    |
|                                  | <i>Time constraints</i>         | Ali, Chong <sup>a,b</sup> , Finnerty <sup>2019</sup> , Hamann <sup>2016</sup> , Ishi, Lovell, Nott, Patel, Schön, Van der Krieke, Velligan, Younas, Zaini                                                                                                                    |
| <b>Stigma</b>                    |                                 | Aoki <sup>a</sup> , Chong <sup>b</sup> , Hamann <sup>2017a</sup> , Klausen, Lovell, Luken, Patel, Raue                                                                                                                                                                       |
