# Supplementary material for: Shared decision making for adults with severe mental illness: A concept analysis
Source: PubMed Central journal article supplement — Jpn J Nurs Sci. 2020 Aug 5;17(4):e12365. doi: 10.1111/jjns.12365 (PMC7590107; doi:10.1111/jjns.12365), 2020-08-05
Supplement: JJNS-17-na-s003.pdf [file JJNS-17-na-s003.pdf]

### Appendix 3. Consequences of SDM for adults with SMI

| Themes                                  | Sub-themes                       | Article                                                                                                                                                                                                         |
|-----------------------------------------|----------------------------------|-----------------------------------------------------------------------------------------------------------------------------------------------------------------------------------------------------------------|
| <b>Decision-making related outcomes</b> | <i>Greater engagement</i>        | Alegria, Aoki <sup>a,b</sup> , Goscha, Hamann <sup>2011,2016</sup> , Klingaman, LeBlanc, Matthias <sup>2014</sup> , Schön, Zisman-ilani                                                                         |
|                                         | <i>Less conflict</i>             | Aoki <sup>a</sup> , Metz <sup>2019</sup> , Paudel, Perestelo, Ramon                                                                                                                                             |
|                                         | <i>More satisfaction</i>         | Aljumah, Aoki <sup>a</sup> , De las Cuevas <sup>2014</sup> , Grim, Klingaman, LeBlanc, Paudel, Ramon, Schön, Shepherd, Solberg, Woltmann <sup>2011</sup> , Younas                                               |
|                                         | <i>More responsibility</i>       | Ehrlich, Eliacin, Hamann <sup>2011</sup> , Paudel, Sather                                                                                                                                                       |
|                                         | <i>No time extension</i>         | Aoki <sup>b</sup> , Bonfils, LeBlanc                                                                                                                                                                            |
| <b>Users' changes</b>                   | <i>Knowledgeable</i>             | Aoki <sup>a</sup> , Klingaman, LeBlanc, Martin, Paudel, Perestelo, Schön, Shepherd, Stein, Woltmann <sup>2011</sup> , Zisman-ilani                                                                              |
|                                         | <i>Persistence of treatment</i>  | Aljumah, De las Cuevas <sup>2014</sup> , Ehrlich, Finnerty <sup>2018</sup> , Hamann <sup>2011</sup> , Ishi, Matthias <sup>2014</sup> , Mikesell, Nott, Raue, Shepherd, Younas                                   |
|                                         | <i>Empowerment</i>               | Aoki <sup>a</sup> , De las Cuevas <sup>2011</sup> , Ehrlich, Eliacin, Goscha, Hamann <sup>2017b</sup> , Klingaman, Lovell, Martin, Matthias <sup>2014</sup> , Nott, Park, Ramon, Stein                          |
|                                         | <i>Active self-management</i>    | Goscha, Matthias <sup>2012,2017</sup> , Ramon                                                                                                                                                                   |
|                                         | <i>Promoted wellness</i>         | Goscha, Ramon                                                                                                                                                                                                   |
| <b>Professionals' changes</b>           | <i>Awareness of users' views</i> | Ramon, Schön, Woltmann <sup>2011</sup>                                                                                                                                                                          |
|                                         | <i>Confidence to openness</i>    | Ramon                                                                                                                                                                                                           |
| <b>Enhanced relationship</b>            |                                  | Aoki <sup>a</sup> , De las Cuevas <sup>2014</sup> , Ehrlich, Goscha, Grim, Hamann <sup>2011</sup> , Martin, Matthias <sup>2014</sup> , Mikesell, Ramon, Schön, Shepherd, Stein, Yamaguchi, Younas, Zisman-ilani |
